# Supplementary material for: A Systematic Review on Metabolomics Analysis in Hearing Impairment: Is It a Possible Tool in Understanding Auditory Pathologies?
Source: MDPI journal article supplement (doi:10.3390/ijms242015188), 2023-10-14
Supplement: s1 [file s1]

**Supplementary Table S1:** The technologies used in metabolomics studies, their full names, and their advantages and disadvantages for both targeted and untargeted metabolomics

| Technology                 | Full Name                                                                                             | Advantages for Targeted Metabolomics                   | Disadvantages for Targeted Metabolomics                  | Advantages for Untargeted Metabolomics               | Disadvantages for Untargeted Metabolomics            |
|----------------------------|-------------------------------------------------------------------------------------------------------|--------------------------------------------------------|----------------------------------------------------------|------------------------------------------------------|------------------------------------------------------|
| <b>LC-MS</b>               | Liquid Chromatography-Mass Spectrometry                                                               | High sensitivity, broad metabolite coverage            | Limited to pre-defined metabolites                       | Comprehensive profiling, diverse metabolites         | Data complexity, challenges in annotation            |
| <b>LC-MS/MS</b>            | Liquid Chromatography-Tandem Mass Spectrometry                                                        | Improved selectivity and sensitivity                   | Targeted approach, potential for missing metabolites     | Broad metabolite coverage, structural info           | Complexity, need for extensive databases             |
| <b>GC-MS</b>               | Gas Chromatography-Mass Spectrometry                                                                  | High resolution, stability of GC column                | Limited to volatile and thermally stable compounds       | Excellent quantification, reproducibility            | Limited to volatile compounds, derivatization needed |
| <b>HILIC-UHPLC-QTOF-MS</b> | Hydrophilic Interaction Liquid Chromatography- Ultra high pressure – quadrupole and time of flight MS | Separation of polar metabolites                        | Reduced coverage of non-polar compounds                  | Comprehensive separation of polar compounds          | Limited separation of non-polar metabolites          |
| <b>LC-ESI-MS</b>           | Liquid Chromatography-Electrospray Ionization-MS                                                      | High sensitivity, ionization of broad metabolite range | Variable ionization efficiency, matrix effects           | Comprehensive profiling, wide metabolite range       | Ion suppression, interference from complex matrices  |
| <b>HPLC-MS/MS</b>          | High Performance Liquid Chromatography-MS/MS                                                          | High specificity and sensitivity                       | Limited to pre-defined metabolites, fragmentation limits | Targeted analysis with high accuracy and selectivity | Narrow scope, challenges in comprehensive profiling  |
| <b>UPLC-MS/MS</b>          | Ultra Performance Liquid Chromatography-MS/MS                                                         | Improved separation, high throughput                   | Targeted approach, potential for missing metabolites     | Broad metabolite coverage, enhanced sensitivity      | Equipment cost, complexity of analysis               |
| <b>GC-TOF/MS</b>           | Gas Chromatography-Time of Flight Mass Spectrometry                                                   | High resolution, broad coverage                        | Limited to volatile compounds                            | Comprehensive profiling, accurate mass measurement   | Sample derivatization, limited to volatile compounds |
| <b>GC-HRMS</b>             | Gas Chromatography-High Resolution Mass Spectrometry                                                  | High resolution, accurate mass measurement             | Limited to volatile compounds                            | Broad metabolite coverage, structural info           | Limited to volatile compounds, data complexity       |

|                      |                                                         |                                                 |                                                       |                                                      |                                                       |
|----------------------|---------------------------------------------------------|-------------------------------------------------|-------------------------------------------------------|------------------------------------------------------|-------------------------------------------------------|
| <b>UHPLC-QTOF MS</b> | Ultra High-Performance Liquid Chromatography-QTOF MS    | High resolution, accurate mass measurement      | Limited to specific chromatographic conditions        | Comprehensive profiling, accurate mass measurement   | Variable performance depending on instrument settings |
| <b>LC-HRMS</b>       | Liquid Chromatography-High Resolution Mass Spectrometry | High resolution, accurate mass measurement      | Variable performance depending on instrument settings | Broad metabolite coverage, accurate mass measurement | Sample complexity, ion suppression                    |
| <b>NMR</b>           | Nuclear Magnetic Resonance                              | Non-destructive, quantitative without standards | Lower sensitivity, limited dynamic range              | Comprehensive profiling, non-destructive             | Limited sensitivity, spectral overlap                 |
